# Supplementary material
Source: Springer Nature journal article supplement (https://www.springermedizin.de/resource/supplementary/12913_2007_369_MOESM1_ESM.pdf/9535036)
Supplement: MOESM1 [file 9535036]

Outpatient clinic (DM, CVD, COPD)

Screening by department nurse or by questionnaire

Randomisation

**Intervention group**

(at department of psychiatry, contracting by CPN and psychiatrist)

Care management by CPN.  
If needed antidepressant protocol by psychiatrist.

**Care as usual group**

(at DM, CVD or COPD outpatient clinic)

CAU  
(content not known yet)
